# Supplementary material for: Caenorhabditis elegans Cyclin D/CDK4 and Cyclin E/CDK2 Induce Distinct Cell Cycle Re-Entry Programs in Differentiated Muscle Cells
Source: PLoS Genet. 2011 Nov 10;7(11):e1002362. doi: 10.1371/journal.pgen.1002362 (PMC3213155; doi:10.1371/journal.pgen.1002362)
Supplement: Table S4 — Transcription-factor binding sites enriched in the promoters of Cyclin/CDK-induced genes. Includes sequence logos for the recognition sites of the transcription factors identified in the promoter analysis. The Clover raw score indicates how frequently a motif is present. For E2F sites, this score is 44 for the set of 143 genes upregulated in CYD-1/CDK-4 animals but not in CYE-1/CDK-2 animals, as compared to 167 ± 7 on average for a random selection of 143 genes induced by CYD-1/CDK-4 as well as CYE-2/CDK-2AF. (XLSX) [file pgen.1002362.s009.xlsx]

## Sheet: TF enrichment
		Clover				Absolute TF site numbers
	Enriched ≥ 2-fold in CYD-1/CDK-4					Dataset	Promoters analyzed	E2F1 sites	E2F1 sites/promoter	EFL-1 sites	EFL-1 sites/promoter
	Rank	TF	Raw-score	p-value		Enriched in CYD-1/CDK-4	378	1276	3.37566	614	1.62434
	1	E2F1	306	<0.001		Enriched in CYE-1/CDK-2AF	211	781	3.70142	375	1.77725
	2	SPT23	279	<0.001		Enriched only in CYD-1/CDK-4	139	386	2.77698	200	1.43885
	3	RSC3	259	<0.001		Whole genome	18362	49126	2.67542	18941	1.03153
	4	SUM1	234	0.033
	5	EFL-1	222	<0.001
	Enriched ≥ 2-fold in CYE-1/CDK-2AF
	Rank	TF	Raw-score	p-value
	1	E2F1	231	<0.001
	2	RSC3	207	<0.001
	3	EFL-1	185	<0.001
	4	SPT23	157	<0.001
	5	SUM1	149	<0.001
	Enriched only in CYD-1/CDK-4, not in CYE-1/CDK-2AF
	Rank	TF	Raw-score	p-value
	1	CHA4	53	<0.001
	2	SUT1	47	<0.001
	3	E2F1	44	0.012
	4	RSC3	41	<0.001
	5	btd	38	0.003
	12	EFL-1	24	<0.001
	Subset of 143 genes from both enriched >2-fold, 100 randomizations
	TF	Average Raw-score		Average p-value
	E2F1	167.32 ± 7.25		<0.001
	EFL-1	136.46 ± 10.78		<0.001
